# Supplementary material for: MiR-30c/PGC-1β protects against diabetic cardiomyopathy via PPARα
Source: Cardiovasc Diabetol. 2019 Jan 11;18:7. doi: 10.1186/s12933-019-0811-7 (PMC6329097; doi:10.1186/s12933-019-0811-7)
Supplement: Supplementary file 3 — Additional file 3. Table S2. microRNA targeting PGC-1β predicted by TargetScan, PicTar and TarBase websites. [file 12933_2019_811_MOESM3_ESM.xlsx]

## Sheet: Sheet1
Table S2. microRNA targeting PGC-1β predicted by TargetScan, PicTar and TarBase websites
PicTar	TarBase	TargetScan	PicTar & TarBase	PicTar & TargetScan	TarBase & TargetScan	PicTar & TarBase & TargetScan
hsa-miR-30e-5p	hsa-miR-23b-3p	hsa-miR-4458	hsa-miR-30e-5p	hsa-miR-30e-5p	hsa-miR-148b-3p	hsa-miR-30e-5p
hsa-miR-98-5p	hsa-miR-19b-3p	hsa-miR-4500	hsa-miR-30c-5p	hsa-miR-98-5p	hsa-miR-30a-5p	hsa-miR-30c-5p
hsa-let-7e-5p	hsa-miR-148b-3p	hsa-let-7b-5p	hsa-miR-30b-5p	hsa-let-7e-5p	hsa-miR-30b-5p	hsa-miR-30b-5p
hsa-let-7g-5p	hsa-miR-30a-5p	hsa-let-7c-5p	hsa-miR-30a-5p	hsa-let-7g-5p	hsa-miR-30c-5p	hsa-miR-30a-5p
hsa-let-7i-5p	hsa-miR-30b-5p	hsa-let-7d-5p		hsa-let-7i-5p	hsa-miR-30d-5p
hsa-let-7b-5p	hsa-miR-30c-5p	hsa-let-7i-5p		hsa-let-7b-5p	hsa-miR-30e-5p
hsa-let-7f-5p	hsa-miR-30d-5p	hsa-let-7e-5p		hsa-let-7f-5p	hsa-miR-148a-3p
hsa-let-7c-5p	hsa-miR-30e-5p	hsa-miR-98-5p		hsa-let-7c-5p	hsa-miR-149-5p
hsa-let-7a-5p	hsa-miR-101-3p	hsa-let-7f-5p		hsa-let-7a-5p	hsa-miR-152-3p
hsa-miR-30c-5p	hsa-miR-130a-3p	hsa-let-7g-5p		hsa-miR-30c-5p	hsa-miR-330-3p
hsa-miR-30b-5p	hsa-miR-130b-3p	hsa-let-7a-5p		hsa-miR-30b-5p
hsa-miR-30a-5p	hsa-miR-144-3p	hsa-miR-30e-5p		hsa-miR-30a-5p
hsa-miR-214-3p	hsa-miR-148a-3p	hsa-miR-30d-5p		hsa-miR-26b-5p
hsa-miR-124a-3p	hsa-miR-149-5p	hsa-miR-30a-5p		hsa-miR-26a-5p
hsa-miR-26b-5p	hsa-miR-152-3p	hsa-miR-30c-5p
hsa-miR-26a-5p	hsa-miR-186-5p	hsa-miR-30b-5p
	hsa-miR-1910-5p	hsa-miR-1297
	hsa-miR-21-3p	hsa-miR-4465
	hsa-miR-301a-3p	hsa-miR-26b-5p
	hsa-miR-301b-3p	hsa-miR-26a-5p
	hsa-miR-30c-1-3p	hsa-miR-375
	hsa-miR-30c-2-3p	hsa-miR-505-3p.2
	hsa-miR-330-3p	hsa-miR-505-3p.1
	hsa-miR-338-5p	hsa-miR-449b-5p
	hsa-miR-425-5p	hsa-miR-449a
	hsa-miR-5094	hsa-miR-34c-5p
	hsa-miR-590-3p	hsa-miR-34a-5p
	hsa-miR-769-3p	hsa-miR-1197
	kshv-miR-K12-10a-3p	hsa-miR-203a-3p.1
	kshv-miR-K12-1-5p	hsa-miR-377-3p
	hsa-miR-182-5p	hsa-miR-323a-3p
	hsa-miR-146a-5p	hsa-miR-101-3p.1
	hsa-miR-200b-3p	hsa-miR-153-3p
		hsa-miR-148a-3p
		hsa-miR-148b-3p
		hsa-miR-152-3p
		hsa-miR-140-3p.1
		hsa-miR-326
		hsa-miR-330-5p
		hsa-miR-139-5p
		hsa-miR-7-5p
		hsa-miR-22-3p
		hsa-miR-27a-3p
		hsa-miR-27b-3p
		hsa-miR-32-5p
		hsa-miR-25-3p
		hsa-miR-367-3p
		hsa-miR-363-3p
		hsa-miR-92b-3p
		hsa-miR-92a-3p
		hsa-miR-302c-3p.2
		hsa-miR-520f-3p
		hsa-miR-302a-3p
		hsa-miR-302d-3p
		hsa-miR-302b-3p
		hsa-miR-302c-3p.1
		hsa-miR-520b
		hsa-miR-520c-3p
		hsa-miR-520d-3p
		hsa-miR-373-3p
		hsa-miR-520e
		hsa-miR-372-3p
		hsa-miR-520a-3p
		hsa-miR-302e
		hsa-miR-526b-3p
		hsa-miR-519d-3p
		hsa-miR-20a-5p
		hsa-miR-106b-5p
		hsa-miR-93-5p
		hsa-miR-20b-5p
		hsa-miR-17-5p
		hsa-miR-106a-5p
		hsa-miR-6893-3p
		hsa-miR-370-3p
		hsa-miR-135b-5p
		hsa-miR-135a-5p
		hsa-miR-491-5p
		hsa-miR-543
		hsa-miR-137
		hsa-miR-320b
		hsa-miR-320c
		hsa-miR-4429
		hsa-miR-320d
		hsa-miR-320a
		hsa-miR-124-3p.1
		hsa-miR-506-3p
		hsa-miR-124-3p.2
		hsa-miR-599
		hsa-miR-28-3p
		hsa-miR-138-5p
		hsa-miR-101-3p.2
		hsa-miR-455-3p.2
		hsa-miR-1251-5p
		hsa-miR-149-5p
		hsa-miR-339-5p
		hsa-miR-10b-5p
		hsa-miR-10a-5p
		hsa-miR-3129-5p
		hsa-miR-199b-3p
		hsa-miR-199a-3p
		hsa-miR-144-3p
		hsa-miR-365b-3p
		hsa-miR-365a-3p
		hsa-miR-330-3p
		hsa-miR-495-3p
		hsa-miR-5688
		hsa-miR-340-5p
		hsa-miR-410-3p
		hsa-miR-142-5p
		hsa-miR-5590-3p
		hsa-miR-376c-3p
		hsa-miR-374c-5p
		hsa-miR-655-3p
		hsa-miR-369-3p
		hsa-miR-582-5p
		hsa-miR-136-5p
		hsa-miR-216b-5p
		hsa-miR-216a-5p
